# Supplementary material for: Comparative analysis reveals signatures of differentiation amid genomic polymorphism in Lake Malawi cichlids
Source: PubMed Central journal article supplement (PMC2530870; doi:10.1186/gb-2008-9-7-r113), 2008-07-10
Supplement: gb-2008-9-7-r113-S1.pdf [file gb-2008-9-7-r113-S1.pdf]

Supplementary Table 1. Trace sequence statistics of five Lake Malawi cichlid species.

|                                  | <i>C. conophorus</i> | <i>L. fuelleborni</i> | <i>M. auratus</i> | <i>M. zebra</i> | <i>R. esox</i> |
|----------------------------------|----------------------|-----------------------|-------------------|-----------------|----------------|
| Number of trace reads            | 157,434              | 153,061               | 138,517           | 161,413         | 152,385        |
| Total read length (bases)        | 166,071,742          | 167,074,220           | 137,257,743       | 184,775,275     | 175,769,721    |
| Shortest read length (bases)     | 72                   | 88                    | 76                | 109             | 76             |
| Longest read length (bases)      | 6,759                | 7,264                 | 4,862             | 7,072           | 5,834          |
| Mean read length (bases)         | 1,055                | 1,092                 | 991               | 1,145           | 1,153          |
| Q25 read length (bases)          | 800                  | 893                   | 822               | 844             | 976            |
| Q50 (median) read length (bases) | 1,040                | 1,092                 | 995               | 1,223           | 1,133          |
| Q75 read length (bases)          | 1,313                | 1,237                 | 1,126             | 1,417           | 1,383          |
