# Supplementary material for: Comparative analysis reveals signatures of differentiation amid genomic polymorphism in Lake Malawi cichlids
Source: PubMed Central journal article supplement (PMC2530870; doi:10.1186/gb-2008-9-7-r113), 2008-07-10
Supplement: gb-2008-9-7-r113-S5.pdf [file gb-2008-9-7-r113-S5.pdf]

**Supplementary Table 5. Major allele frequency for biallelic SNPs surveyed across Lake Malawi cichlid populations and species. The first ten loci represent positive controls as explained in the text. Two SNPs were predicted and genotyped in *sws2b*; genotypes were in perfect linkage so only one is shown here.**

| snp/pop                                  | <i>aim1</i>  | <i>mitf</i>   | <i>ednrb</i>  | <i>rhodopsin</i> | <i>sws1</i>   | <i>sws2a</i>  | <i>lws</i>   | <i>dec1_1</i> | <i>dec1_3</i> | <i>ip3r</i><br>(EXON12) |
|------------------------------------------|--------------|---------------|---------------|------------------|---------------|---------------|--------------|---------------|---------------|-------------------------|
| <b>Species</b>                           | <b>NA</b>    | <b>NA</b>     | <b>NA</b>     | <b>NA</b>        | <b>NA</b>     | <b>NA</b>     | <b>NA</b>    | <b>NA</b>     | <b>NA</b>     | <b>NA</b>               |
| <b>All MZ</b>                            | 0.73         | 0.989         | 0.8           | 0.48             | 0.95          | 0.82          | 0.65         | 1             | 0.094         | 0.771                   |
| <b>All LF</b>                            | 0.83         | 0.984         | 0.37          | 0.82             | 1             | 0.99          | 1            | 0.658         | 0.784         | 0.906                   |
| <b>F<sub>ST</sub> (within MZ)</b>        | <b>0.17</b>  | <b>0.05</b>   | <b>-0.004</b> | <b>0.733</b>     | <b>0.572</b>  | <b>0.114</b>  | <b>0.514</b> | <b>NA</b>     | <b>0.02</b>   | <b>0.336</b>            |
| <b>F<sub>ST</sub> (within LF)</b>        | <b>0.172</b> | <b>0.023</b>  | <b>0.736</b>  | <b>0.853</b>     | <b>NA</b>     | <b>-0.006</b> | <b>NA</b>    | <b>0.599</b>  | <b>0.667</b>  | <b>0.066</b>            |
| <b>F<sub>ST</sub> (MZ v LF)</b>          | <b>0.028</b> | <b>-0.004</b> | <b>0.303</b>  | <b>0.2</b>       | <b>0.0444</b> | <b>0.153</b>  | <b>0.358</b> | <b>0.337</b>  | <b>0.65</b>   | <b>0.059</b>            |
| <b>All mbuna (25 sp.)</b>                | 0.7          | 1             | 0.63          | 0.49             | 0.86          | 0.73          | 0.92         | 0.854         | 0.383         | 0.778                   |
| <b>All others (52 sp.)</b>               | 0.992        | 0.73          | 0.042         | 0.08             | 0.71          | 0.044         | 0.792        | 1             | 0.960         | 0.967                   |
| <b>F<sub>ST</sub> (Mbuna v nonMbuna)</b> | <b>0.179</b> | <b>0.358</b>  | <b>0.485</b>  | <b>0.424</b>     | <b>0.227</b>  | <b>0.811</b>  | <b>0.005</b> | <b>0.106</b>  | <b>0.502</b>  | <b>0.144</b>            |

| snp/pop                                  | <i>sws2b</i> | snp14<br>( <i>csrp1</i> ) | <i>sema 3c</i><br>(Exon 12) | <i>sema 3f</i><br>(snp32) | snp10        | snp13         | snp19         | snp21        | snp22        | snp24         |
|------------------------------------------|--------------|---------------------------|-----------------------------|---------------------------|--------------|---------------|---------------|--------------|--------------|---------------|
| <b>Species</b>                           | <b>NA</b>    | <b>LF/MZ</b>              | <b>LF/MZ</b>                | <b>MA/MZ</b>              | <b>CC/RE</b> | <b>MZ/RE</b>  | <b>LF/RE</b>  | <b>CC/MZ</b> | <b>LF/RE</b> | <b>CC/LF</b>  |
| <b>All MZ</b>                            | 0.989        | 0.946                     | 0.94                        | 0.62                      | 1            | 0.978         | 0.76          | 0.55         | 0.91         | 0.82          |
| <b>All LF</b>                            | 0.96         | 0.04                      | 0.9                         | 0.26                      | 1            | 0.962         | 0.27          | 0.96         | 0.22         | 0.85          |
| <b>F<sub>ST</sub> (within MZ)</b>        | <b>-0.01</b> | <b>0.033</b>              | <b>0.135</b>                | <b>0.195</b>              | <b>NA</b>    | <b>0.009</b>  | <b>0.115</b>  | <b>0.218</b> | <b>0.23</b>  | <b>-0.002</b> |
| <b>F<sub>ST</sub> (within LF)</b>        | <b>0.233</b> | <b>0.076</b>              | <b>0.179</b>                | <b>0.557</b>              | <b>NA</b>    | <b>0.059</b>  | <b>0.474</b>  | <b>0.175</b> | <b>0.286</b> | <b>0.216</b>  |
| <b>F<sub>ST</sub> (MZ v LF)</b>          | <b>0.009</b> | <b>0.893</b>              | <b>-0.004</b>               | <b>0.348</b>              | <b>NA</b>    | <b>-0.005</b> | <b>0.366</b>  | <b>0.356</b> | <b>0.643</b> | <b>-0.002</b> |
| <b>All mbuna (25 sp.)</b>                | 0.85         | 0.69                      | 0.86                        | 0.54                      | 1            | 0.9           | 0.62          | 0.91         | 0.92         | 0.43          |
| <b>All others (52 sp.)</b>               | 0.812        | 0.988                     | 0.87                        | 0.02                      | 0.836        | 1             | 0.55          | 0.992        | 1            | 0.21          |
| <b>F<sub>ST</sub> (Mbuna v nonMbuna)</b> | <b>0.097</b> | <b>0.382</b>              | <b>0.009</b>                | <b>0.363</b>              | <b>0.249</b> | <b>0.034</b>  | <b>-0.004</b> | <b>0.15</b>  | <b>0.277</b> | <b>0.443</b>  |

| snp/pop                            | snp25        | snp27        | snp30        | snp33        | snp44        | Aln100099_882 | Aln100200_1799 | Aln100260_1099 | Aln100281_1741 | Aln100340_830 |
|------------------------------------|--------------|--------------|--------------|--------------|--------------|---------------|----------------|----------------|----------------|---------------|
| Species                            | LF/RE        | CC/LF        | MZ/RE        | LF/MA/MZ     | MZ/RE        | CC/LF         | LF/MA          | CC/MZ          | CC/LF          | MA/MZ         |
| All MZ                             | 0.97         | 1            | 0.66         | 0.83         | 0.9          | 0.995         | 1              | 0.844          | 0.021          | 1             |
| All LF                             | 0.88         | 0.93         | 0.89         | 0.15         | 0.97         | 0.411         | 0.642          | 0.927          | 0.891          | 1             |
| F <sub>ST</sub> (within MZ)        | <b>0.052</b> | <b>NA</b>    | <b>0.218</b> | <b>0.174</b> | <b>0.112</b> | <b>-0.003</b> | <b>NA</b>      | <b>0.114</b>   | <b>0.023</b>   | <b>NA</b>     |
| F <sub>ST</sub> (within LF)        | <b>0.337</b> | <b>0.443</b> | <b>0.439</b> | <b>0.21</b>  | <b>0.066</b> | <b>0.35</b>   | <b>0.354</b>   | <b>0.197</b>   | <b>0.19</b>    | <b>NA</b>     |
| F <sub>ST</sub> (MZ v LF)          | <b>0.051</b> | <b>0.068</b> | <b>0.141</b> | <b>0.613</b> | <b>0.031</b> | <b>0.574</b>  | <b>0.352</b>   | <b>0.028</b>   | <b>0.863</b>   | <b>NA</b>     |
| All mbuna (25 sp.)                 | 0.94         | 0.992        | 0.86         | 0.62         | 0.92         | 0.772         | 0.861          | 0.896          | 0.383          | 0.984         |
| All others (52 sp.)                | 0.98         | 1            | 0.05         | 0.984        | 0.992        | 1             | 1              | 0.996          | 0.887          | 1             |
| F <sub>ST</sub> (Mbuna v nonMbuna) | <b>0.031</b> | <b>0.017</b> | <b>0.73</b>  | <b>0.392</b> | <b>0.048</b> | <b>0.171</b>  | <b>0.1</b>     | <b>0.074</b>   | <b>0.446</b>   | <b>0.005</b>  |

| snp/pop                            | Aln100348_1026 | Aln100388_766 | Aln100532_2174 | Aln100617_726 | Aln100645_802 | Aln100674_885 | Aln100815_1005 | Aln100949_327 | Aln100993_1029 | Aln101062_501 |
|------------------------------------|----------------|---------------|----------------|---------------|---------------|---------------|----------------|---------------|----------------|---------------|
| Species                            | CC/LF          | LF/MA         | LF/RE          | MA/RE         | MA/RE         | LF/RE         | MA/RE          | CC/MZ/RE      | LF/RE          | CC/MA/MZ      |
| All MZ                             | 0.408          | 0.78          | 1              | 0.770         | 0.941         | 1             | 0.989          | 1             | 0.957          | 1             |
| All LF                             | 0.037          | 0.7           | 1              | 1             | 1             | 1             | 0.626          | 1             | 0.777          | 1             |
| F <sub>ST</sub> (within MZ)        | <b>0.25</b>    | <b>0.14</b>   | <b>NA</b>      | <b>0.247</b>  | <b>0.178</b>  | <b>NA</b>     | <b>0.001</b>   | <b>NA</b>     | <b>0.118</b>   | <b>NA</b>     |
| F <sub>ST</sub> (within LF)        | <b>0.212</b>   | <b>0.309</b>  | <b>NA</b>      | <b>NA</b>     | <b>NA</b>     | <b>NA</b>     | <b>0.455</b>   | <b>NA</b>     | <b>0.179</b>   | <b>NA</b>     |
| F <sub>ST</sub> (MZ v LF)          | <b>0.328</b>   | <b>0.008</b>  | <b>NA</b>      | <b>0.231</b>  | <b>0.052</b>  | <b>NA</b>     | <b>0.344</b>   | <b>NA</b>     | <b>0.126</b>   | <b>NA</b>     |
| All mbuna (25 sp.)                 | 0.285          | 0.62          | 0.998          | 0.891         | 0.948         | 1             | 0.803          | 1             | 0.853          | 1             |
| All others (52 sp.)                | 0.951          | 0.984         | 0.972          | 1             | 0.966         | 0.960         | 0.627          | 0.826         | 0.996          | 0.614         |
| F <sub>ST</sub> (Mbuna v nonMbuna) | <b>0.591</b>   | <b>0.227</b>  | <b>0.03</b>    | <b>0.078</b>  | <b>-0.002</b> | <b>0.059</b>  | <b>0.083</b>   | <b>0.245</b>  | <b>0.105</b>   | <b>0.518</b>  |

| snp/pop                            | Aln101106<br>_1089 | Aln10117<br>8_1198 | Aln101315<br>_386 | Aln101457<br>_685 | Aln101889<br>_931 | Aln102022<br>_261 | Aln10232<br>1_608 | Aln10250<br>4_1609 | Aln103534<br>_280 | Aln104280<br>_597 |
|------------------------------------|--------------------|--------------------|-------------------|-------------------|-------------------|-------------------|-------------------|--------------------|-------------------|-------------------|
| Species                            | LF/MZ              | MZ/RE              | LF/MZ             | CC/MA             | CC/MZ             | LF/MZ             | CC/MA/RE          | MA/RE              | MA/RE             | CC/MZ             |
| All MZ                             | 0.903              | 0.677              | 0.75              | 1                 | 0.891             | 0.777             | 1                 | 1                  | 0.99              | 0.963             |
| All LF                             | 0                  | 0.810              | 1                 | 1                 | 0.973             | 0.552             | 1                 | 1                  | 1                 | 1                 |
| F <sub>ST</sub> (within MZ)        | <b>0.171</b>       | <b>0.132</b>       | <b>0.019</b>      | NA                | <b>0.065</b>      | <b>0.034</b>      | NA                | NA                 | <b>0.004</b>      | <b>0.14</b>       |
| F <sub>ST</sub> (within LF)        | NA                 | <b>0.139</b>       | NA                | NA                | <b>0.271</b>      | <b>0.5</b>        | NA                | NA                 | NA                | NA                |
| F <sub>ST</sub> (MZ v LF)          | <b>0.904</b>       | <b>0.037</b>       | <b>0.253</b>      | NA                | <b>0.047</b>      | <b>0.097</b>      | NA                | NA                 | <b>0</b>          | <b>0.033</b>      |
| All mbuna (25 sp.)                 | 0.534              | 0.701              | 0.9               | 1                 | 0.925             | 0.704             | 1                 | 1                  | 0.79              | 0.979             |
| All others (52 sp.)                | 0.988              | 0.980              | 0.992             | 0.963             | 0.976             | 0.740             | 0.967             | 0.066              | 0.03              | 0.996             |
| F <sub>ST</sub> (Mbuna v nonMbuna) | <b>0.388</b>       | <b>0.222</b>       | <b>0.085</b>      | <b>0.057</b>      | <b>0.018</b>      | <b>-0.002</b>     | <b>0.048</b>      | <b>0.984</b>       | <b>0.919</b>      | <b>0.006</b>      |

| snp/pop                            | Aln105886<br>_636 | Aln10748<br>4_583 | Aln108541<br>_1573 | Aln110805<br>_783 | Aln110861<br>_250 | Aln111543<br>_577 | Aln11283<br>2_520 | Aln11449<br>8_746 | Aln115071<br>_1230 | Aln115522<br>_691 |
|------------------------------------|-------------------|-------------------|--------------------|-------------------|-------------------|-------------------|-------------------|-------------------|--------------------|-------------------|
| Species                            | CC/MA             | CC/RE             | CC/MA              | CC/MA             | CC/RE             | LF/RE             | LF/MA             | CC/RE             | MA/RE              | LF/MA             |
| All MZ                             | 0.99              | 1                 | 1                  | 0.43              | 1                 | 0.647             | 0.995             | 1                 | 1                  | 1                 |
| All LF                             | 0.99              | 0.989             | 1                  | 0.51              | 1                 | 0.286             | 1                 | 1                 | 1                  | 0.49              |
| F <sub>ST</sub> (within MZ)        | <b>-0.005</b>     | NA                | NA                 | <b>0.249</b>      | NA                | <b>0.088</b>      | <b>-0.003</b>     | NA                | NA                 | NA                |
| F <sub>ST</sub> (within LF)        | <b>0.057</b>      | <b>-0.012</b>     | NA                 | <b>0.238</b>      | NA                | <b>0.49</b>       | NA                | NA                | NA                 | <b>0.266</b>      |
| F <sub>ST</sub> (MZ v LF)          | <b>-0.005</b>     | <b>0.005</b>      | NA                 | <b>0.007</b>      | NA                | <b>0.225</b>      | <b>0</b>          | NA                | NA                 | <b>0.525</b>      |
| All mbuna (25 sp.)                 | 0.97              | 1                 | 1                  | 0.55              | 1                 | 0.490             | 0.996             | 1                 | 0.998              | 0.99              |
| All others (52 sp.)                | 0.75              | 0.95              | 0.832              | 0.912             | 0.832             | 0.984             | 0.956             | 0.960             | 0.617              | 1                 |
| F <sub>ST</sub> (Mbuna v nonMbuna) | <b>0.408</b>      | <b>0.054</b>      | <b>0.252</b>       | <b>0.333</b>      | <b>0.248</b>      | <b>0.406</b>      | <b>0.043</b>      | <b>0.06</b>       | <b>0.503</b>       | <b>0.145</b>      |

| <b>snp/pop</b>                               | <b>Aln116023<br/>_698</b> | <b>Aln11612<br/>0_573</b> | <b>Aln117472<br/>_1109</b> | <b>Aln118796<br/>_231</b> | <b>Aln119531<br/>_730</b> | <b>Aln119718<br/>_628</b> | <b>Aln12159<br/>3_508</b> |
|----------------------------------------------|---------------------------|---------------------------|----------------------------|---------------------------|---------------------------|---------------------------|---------------------------|
| <b>Species</b>                               | <b>CC/MZ</b>              | <b>LF/MA</b>              | <b>MA/MZ</b>               | <b>MA/RE</b>              | <b>MZ/RE</b>              | <b>CC/MA</b>              | <b>CC/RE</b>              |
| <b>All MZ</b>                                | 0.590                     | 1                         | 0.947                      | 1                         | 0.936                     | 0.989                     | 0.819                     |
| <b>All LF</b>                                | 0.865                     | 1                         | 0.958                      | 1                         | 1                         | 0.77                      | 0.964                     |
| <b>F<sub>ST</sub> (within<br/>MZ)</b>        | <b>0.139</b>              | <b>NA</b>                 | <b>0.058</b>               | <b>NA</b>                 | <b>0.473</b>              | <b>-0.005</b>             | <b>0.327</b>              |
| <b>F<sub>ST</sub> (within<br/>LF)</b>        | <b>0.491</b>              | <b>NA</b>                 | <b>0.045</b>               | <b>NA</b>                 | <b>NA</b>                 | <b>0.36</b>               | <b>0.264</b>              |
| <b>F<sub>ST</sub> (MZ v LF)</b>              | <b>0.168</b>              | <b>NA</b>                 | <b>-0.004</b>              | <b>NA</b>                 | <b>0.057</b>              | <b>0.201</b>              | <b>0.097</b>              |
| <b>All mbuna<br/>(25 sp.)</b>                | 0.727                     | 0.992                     | 0.906                      | 1                         | 0.977                     | 0.94                      | 0.871                     |
| <b>All others<br/>(52 sp.)</b>               | 0.992                     | 0.984                     | 0.989                      | 0.989                     | 1                         | 1                         | 0.520                     |
| <b>F<sub>ST</sub> (Mbuna v<br/>nonMbuna)</b> | <b>0.21</b>               | <b>-0.002</b>             | <b>0.061</b>               | <b>0.02</b>               | <b>0.013</b>              | <b>0.074</b>              | <b>0.293</b>              |
